# Supplementary material for: Balancing Selection at the Tomato RCR3 Guardee Gene Family Maintains Variation in Strength of Pathogen Defense
Source: PLOS journal article supplement (doi:10.1371/journal.pgen.1002813), 2012-07-19
Supplement: S13 (10.1371/journal.pgen.1002813.s013) [file journal.pgen.1002813.s013]

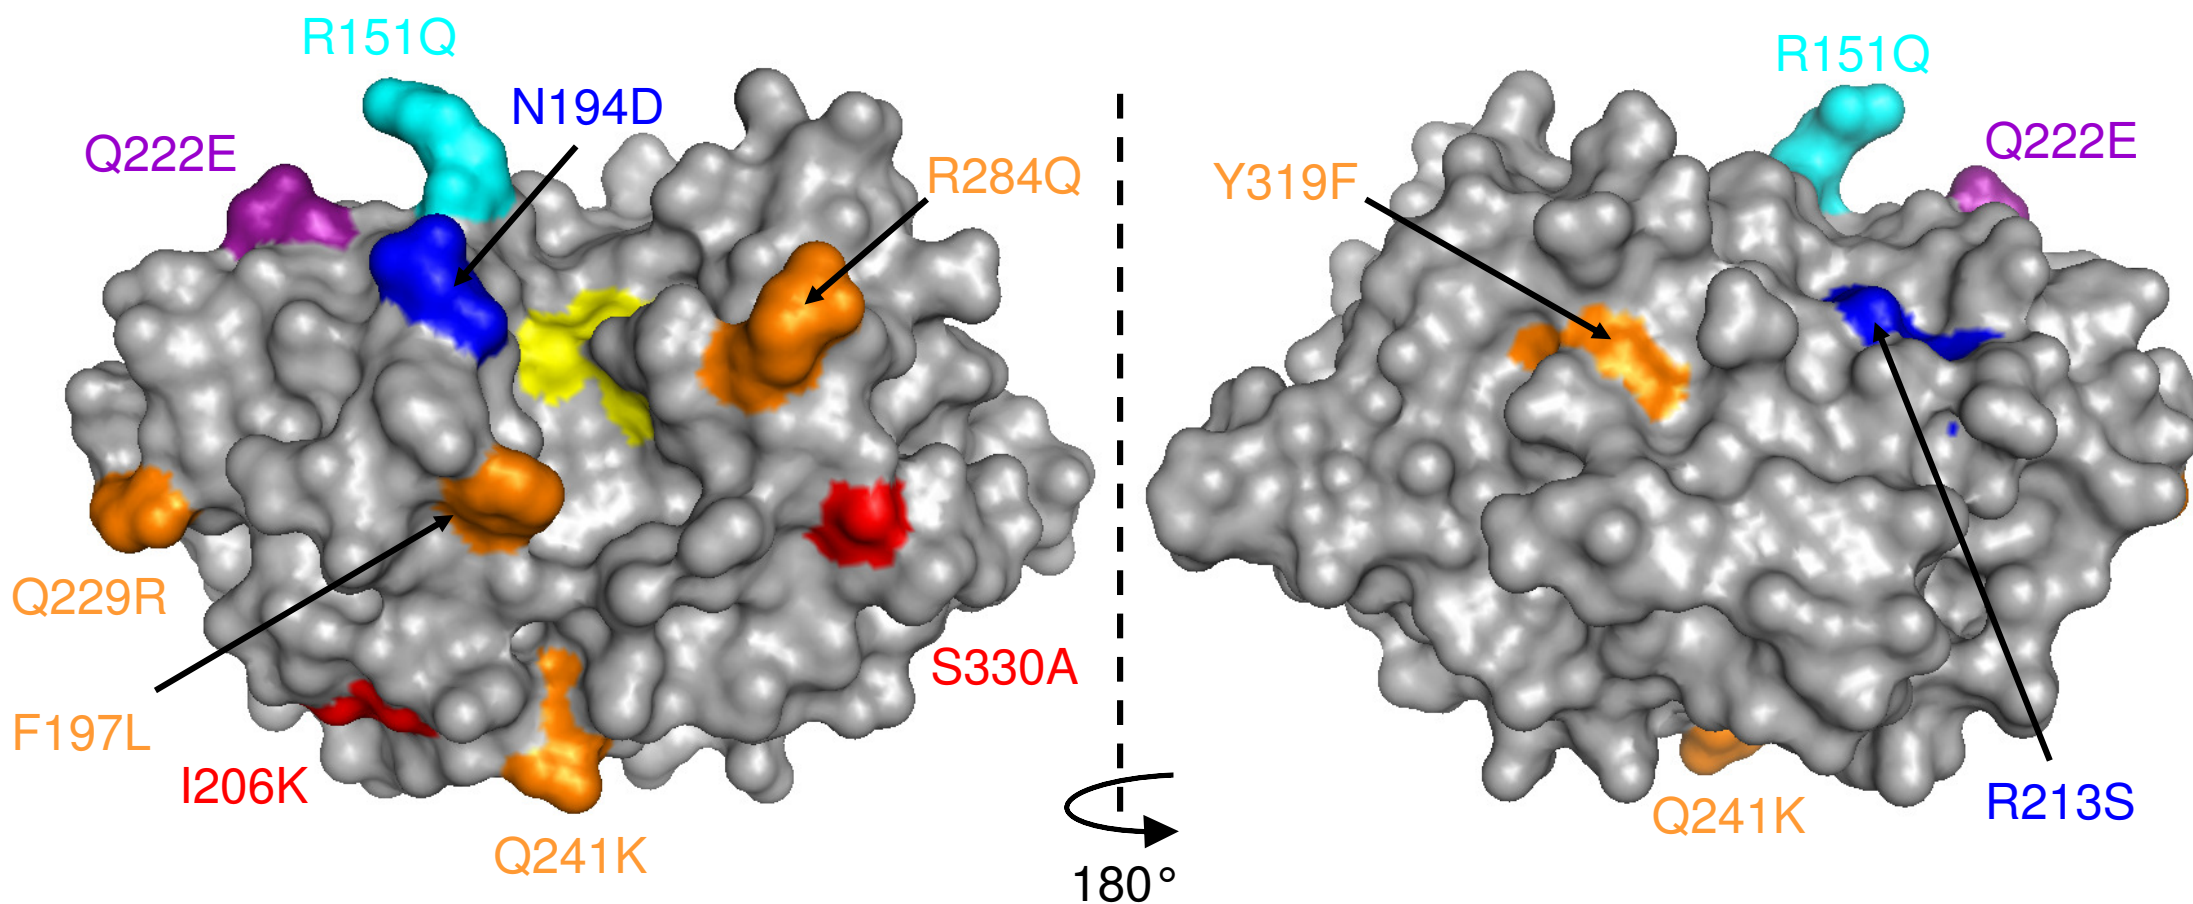

- catalytic centre
- /  differences between RCR3<sup>pim</sup> and RCR3<sup>esc</sup>
- /  associated with attenuated HR
- associated with insensitivity to AVR2 inhibition
- cancels effect of N194D
